# Supplementary material
Source: publisher site journal article supplement (https://www.dovepress.com/article/211907)
Supplement: Supplementary file 1 [file get_supplementary_file.php]

**Supplementary materials**

**4-methyl-*N*-(4-chloro-3-nitrophenyl)-3-[(4-pyridin-3-ylpyrimidin-2-yl) amino]benzamide (V)**

**Fig. S1.** 1H NMR (400 MHz, DMSO-*d*6) of the final compound-nilotinib analogue **V.**

**Fig. S2.** 13C NMR (100 MHz, DMSO-*d6*) of the final compound-nilotinib analogue **V.**

**Fig. S3.** High resolution ESI-MS of the final compound-nilotinib analogue **V.**

**4-methyl-*N*-(4-amino-3-trifluoromethyl)-3-[(4-pyridin-3-ylpyrimidin-2-yl) amino]benzamide (VI).**

**Fig. S4.** 1H NMR (400 MHz, DMSO-*d*6) of the final compound-nilotinib analogue **VI**

**Fig. S5.** 13C NMR (100 MHz, DMSO-*d6*) of the final compound-nilotinib analogue **VI**

**Fig. S6.** High resolution ESI-MS of the final compound-nilotinib analogue **VI**

**1-(4-methyl-3-[(4-pyridin-3-yl)pyrimidin-2-ylamino)phenyl]-3-(phenyl)urea (VII).**

**
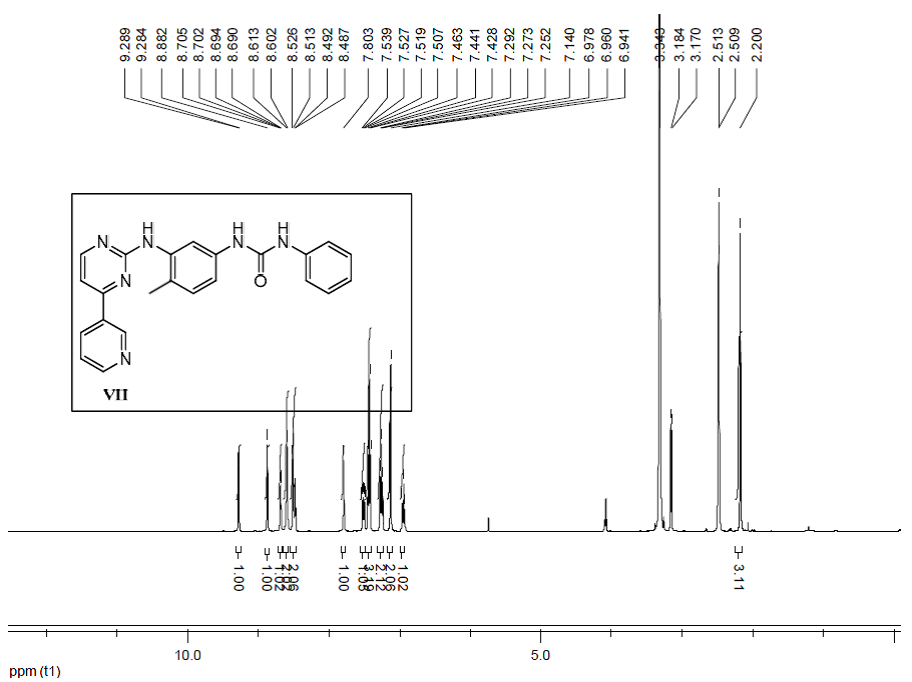
**


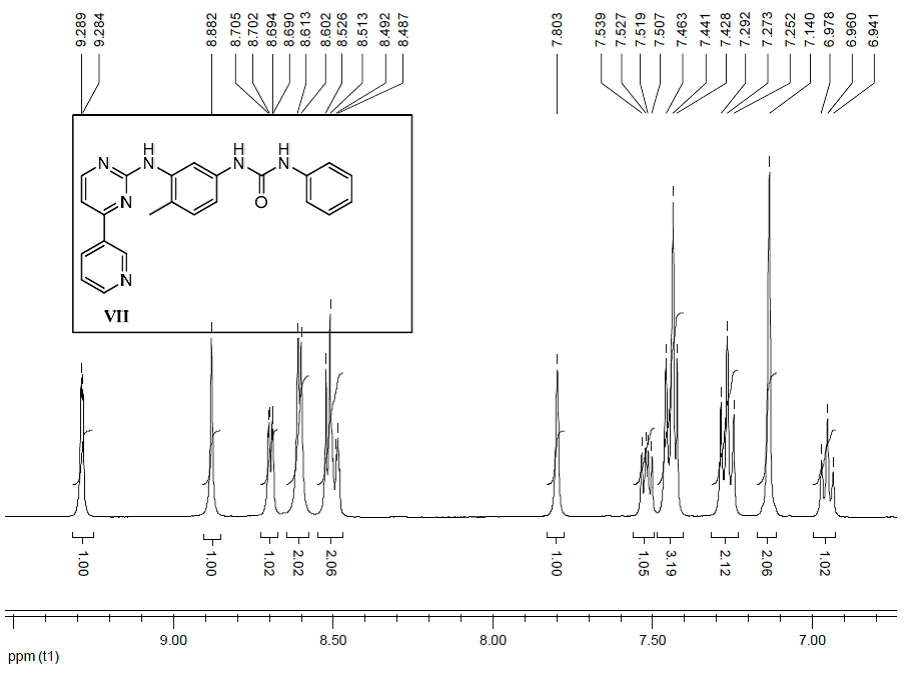


**Fig. S7.** 1H NMR (400 MHz, DMSO-*d*6) of the final compound-imatinib or nilotinib analogue **VII**


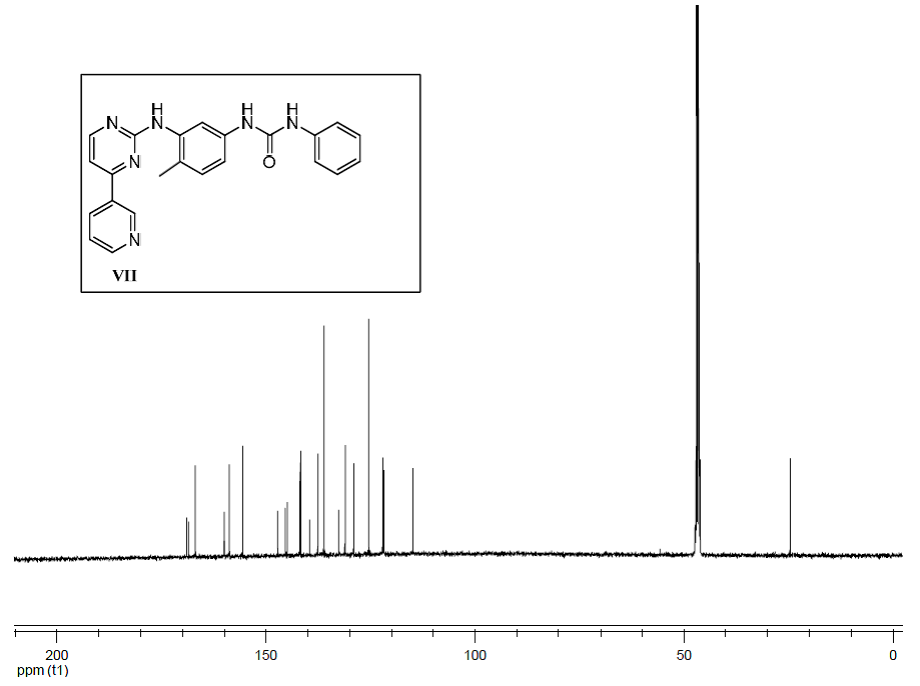


**Fig. S8.** 13C NMR (100 MHz, DMSO-*d6*) of the final compound-imatinib or nilotinib analogue **VII**


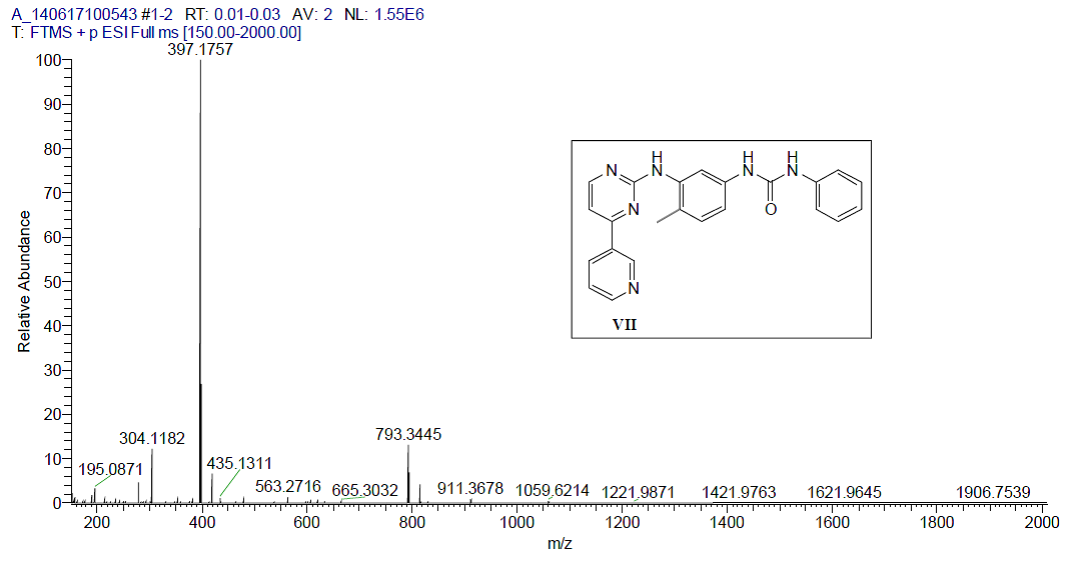


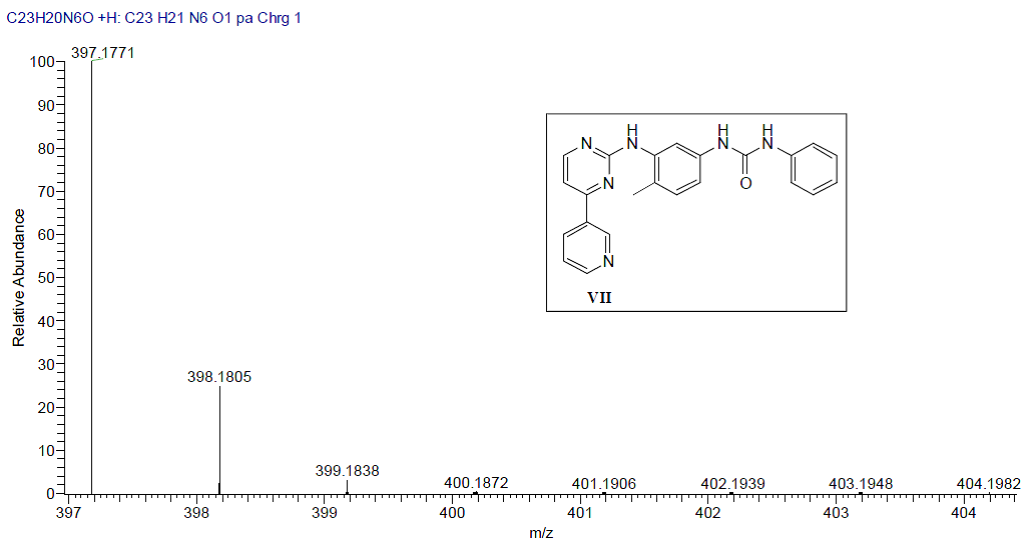


**Fig. S9.** High resolution ESI-MS of the final compound- imatinib or nilotinib analogue **VII**

**1-(4-methyl-3-[(4-pyridin-3-yl)pyrimidin-2-ylamino)phenyl]-3-(4-chloro-3-nitrophenyl)urea (VIII).**


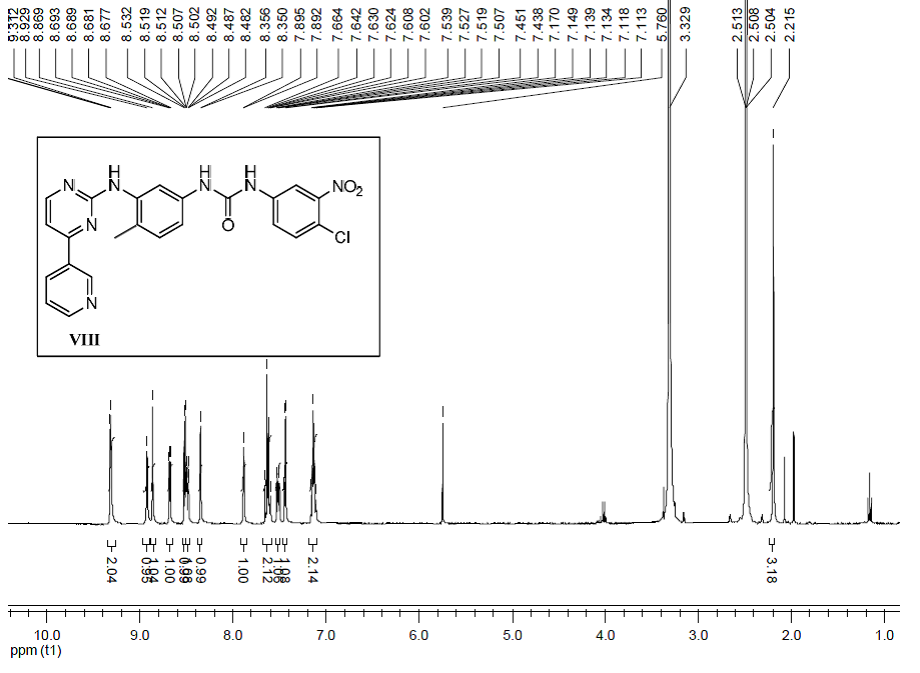


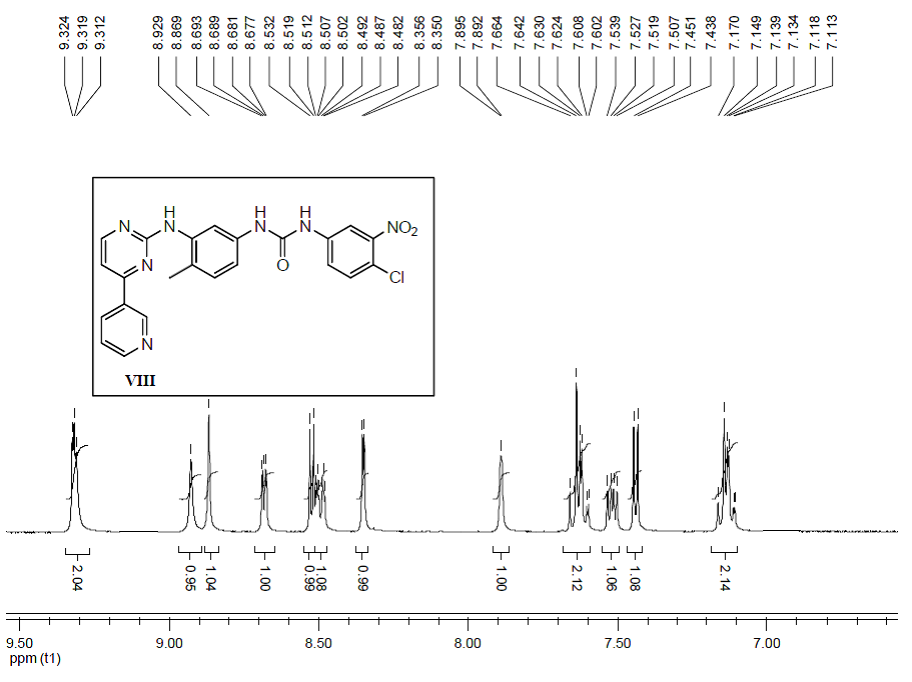


**Fig. S10.** 1H NMR (400 MHz, DMSO-*d*6) of the final compound-imatinib or nilotinib analogue **VIII.**


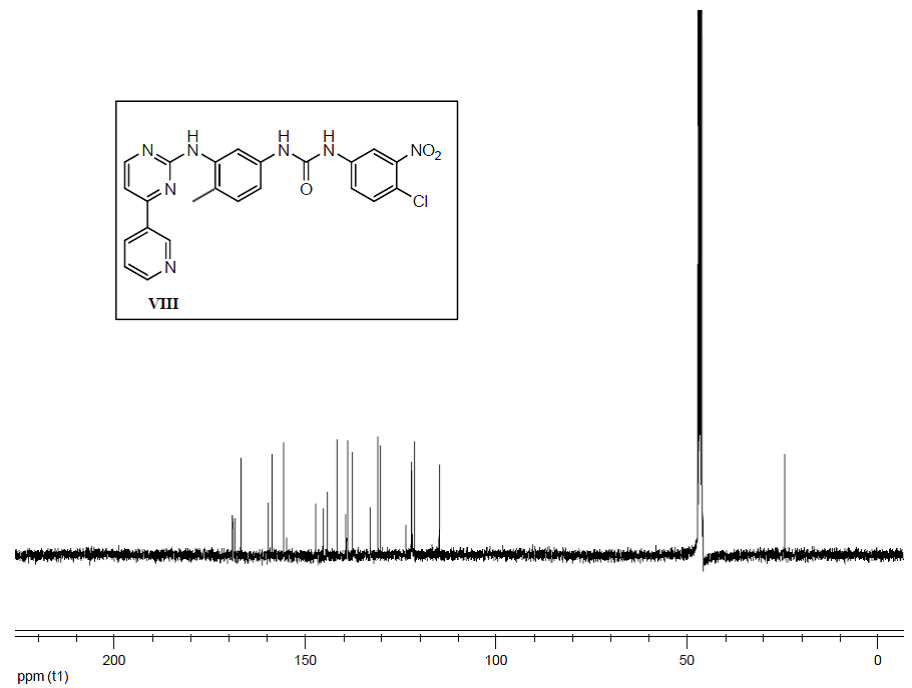


**Fig. S11.** 13C NMR (100 MHz, DMSO-*d6*) of the final compound-imatinib or nilotinib analogue **VIII.**


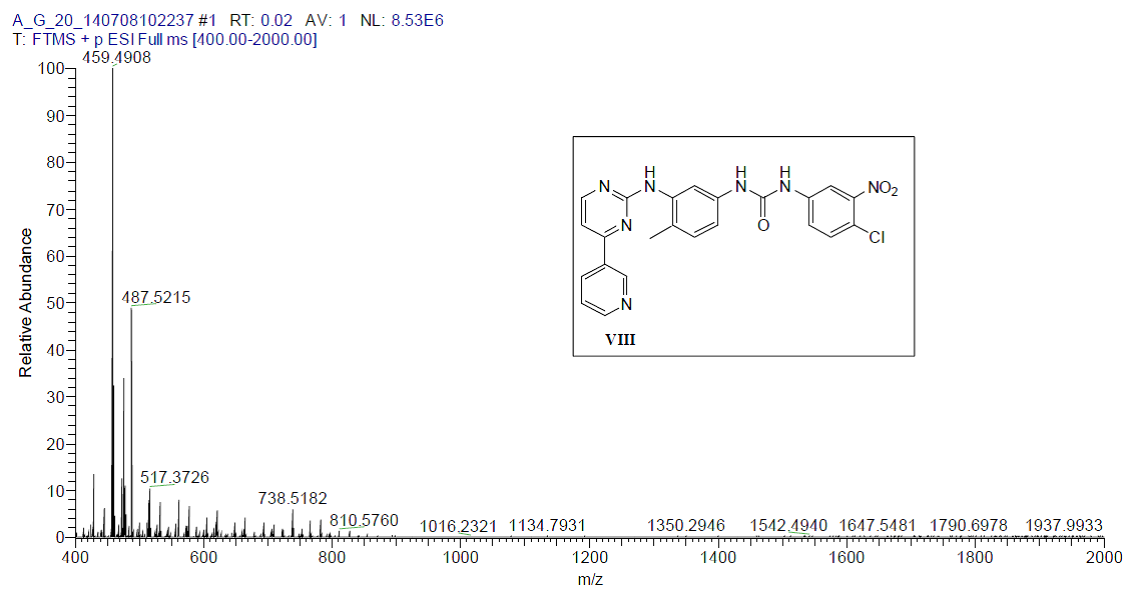


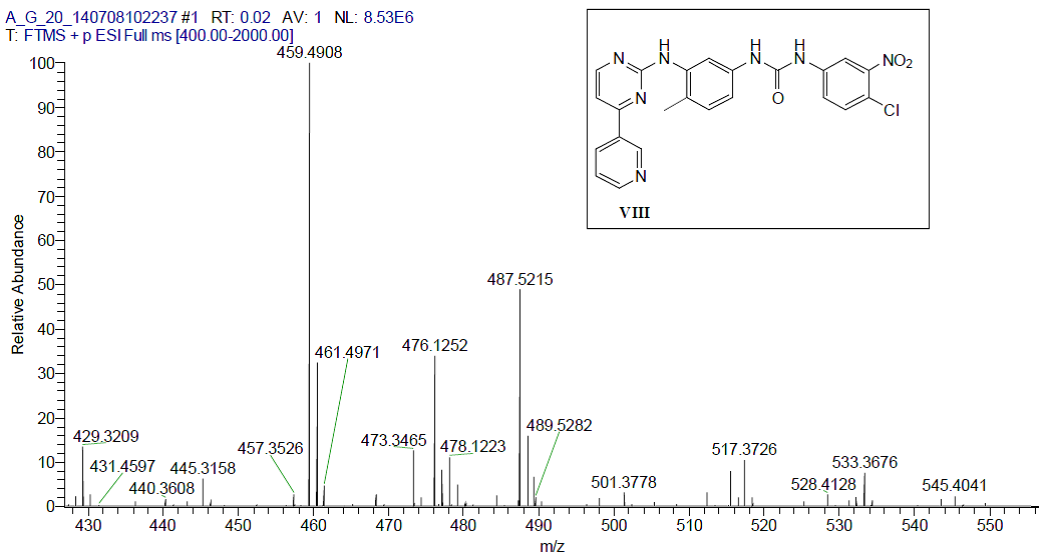


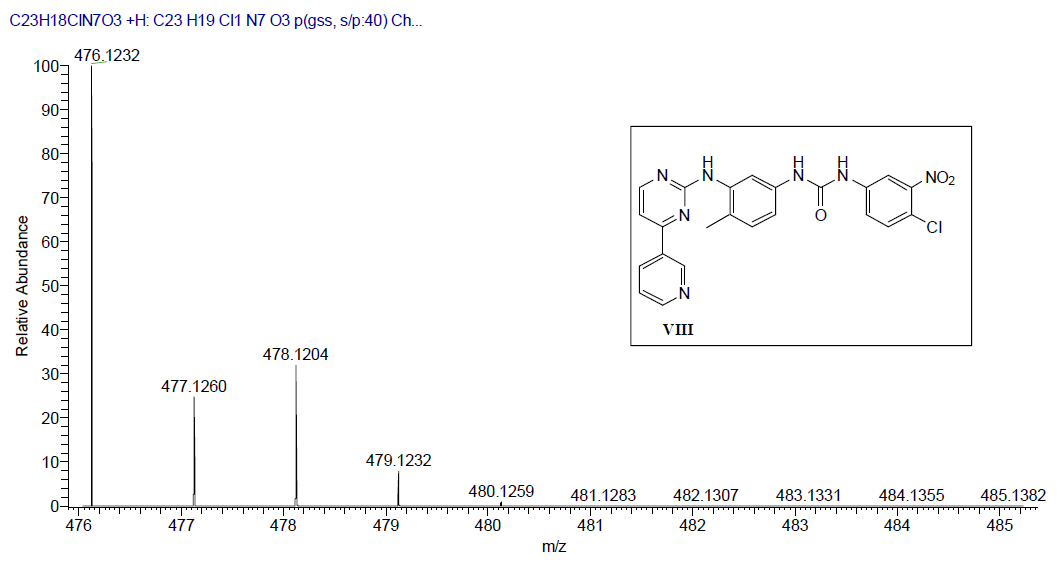


**Fig. S12.** High resolution ESI-MS of the final compound-imatinib or nilotinib analogue **VIII.**
